# Supplementary material for: Carbon-encapsulated NiO nanoparticle decorated single-walled carbon nanotube thin films for binderless flexible electrodes of supercapacitors
Source: Royal Society of Chemistry journal article supplement (doi:10.1039/c7ta08852c), 2017-01-01
Supplement: c7ta08852c1.pdf [file c7ta08852c1.pdf]

## *Supporting Information*

### **Carbon-encapsulated NiO nanoparticle decorated single-wall carbon nanotube thin films for binderless flexible electrodes of supercapacitors**

Abdul Majeed,<sup>ab</sup> Peng-Xiang Hou,<sup>\*a</sup> Song Jiang<sup>a</sup>, Jin-Cheng Li,<sup>a</sup> Lin-Quan Ping,<sup>a</sup> Guo-Xian Li,<sup>a</sup> Feng Zhang,<sup>a</sup> Chang Liu<sup>\*a</sup> and Hui-Ming Cheng<sup>acd</sup>

<sup>a</sup>*Shenyang National Laboratory for Materials Science, Institute of Metal Research (IMR), Chinese Academy of Sciences, 72 Wenhua Road, Shenyang, 110016, China.*

<sup>b</sup>*University of Chinese Academy of Sciences (UCAS), 19 A Yuquan Road, Beijing, 100049, China.*

<sup>c</sup>*Tsinghua-Berkeley Shenzhen Institute (TBSI), Tsinghua University, Shenzhen 518055, China.*

<sup>d</sup>*Centre of Excellence in Environmental Studies (CEES), King Abdulaziz University, Jeddah 21589, Saudi Arabia.*

\*Corresponding Author: cliu@imr.ac.cn (C. Liu) or pxhou@imr.ac.cn (P.X. Hou).

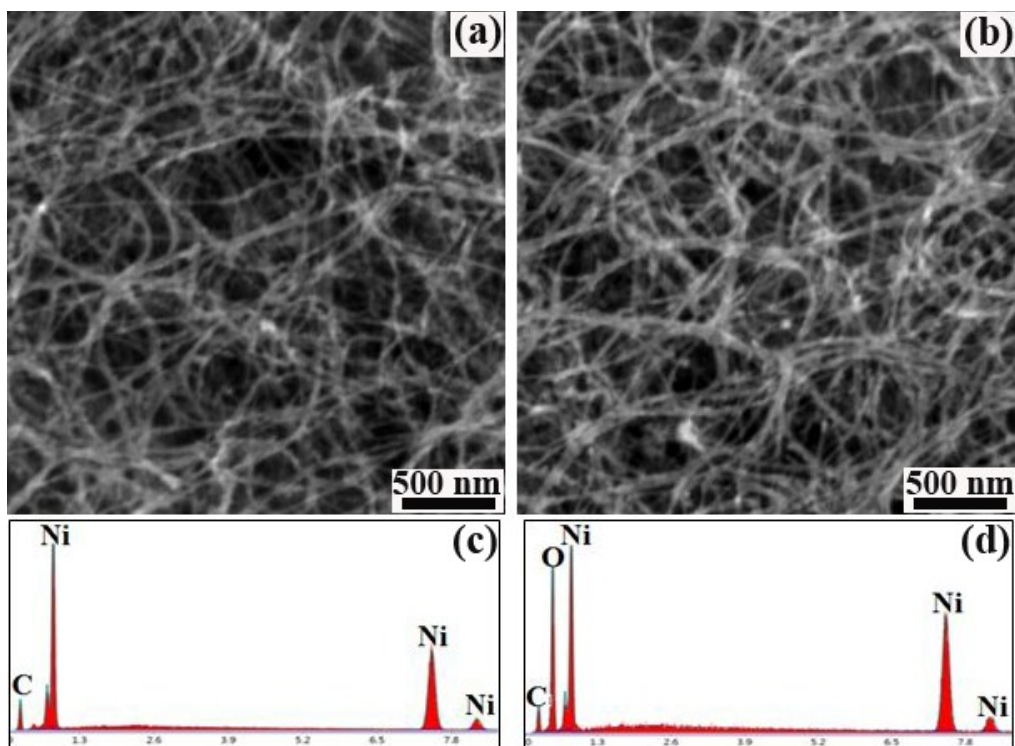

Fig. S1 SEM images of the (a) an as-grown CENi/SWCNT film and (b) CENiO/SWCNT film. (c) EDS spectra of a CENi/SWCNT film. (d) EDS spectra of a CENiO/SWCNT film.

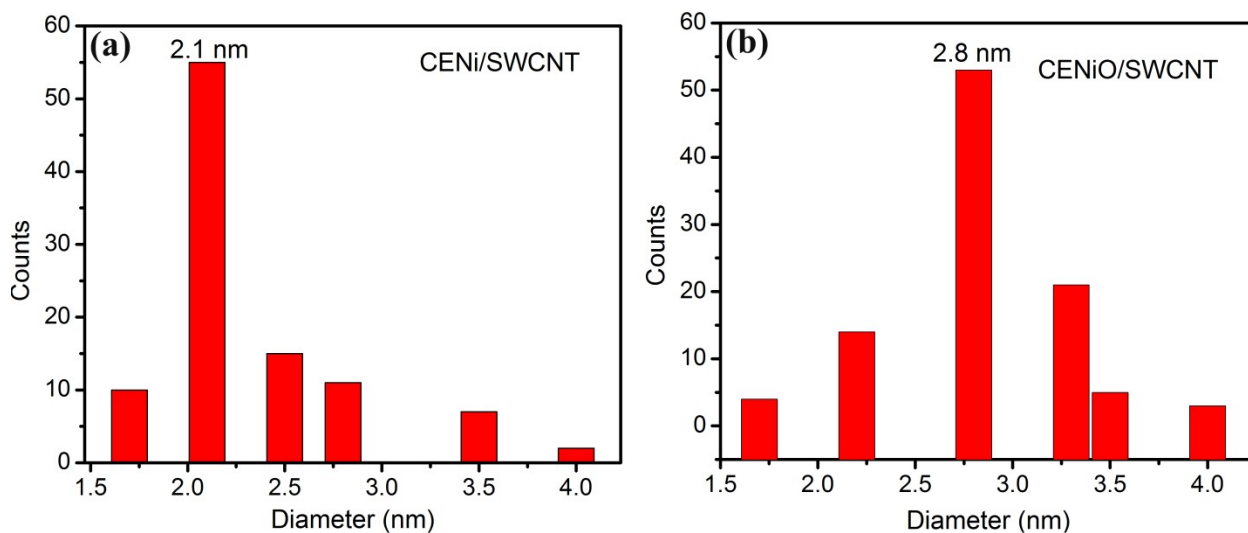

Fig. S2 Size distributions of (a) Ni nanoparticles in a CENi/SWCNT film and of (b) NiO particles in a CENiO/SWCNT film based on TEM observations.

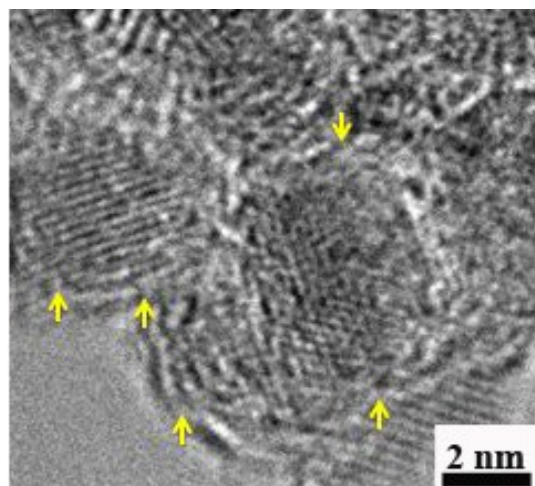

Fig. S3 HRTEM image of CENiO/SWCNT film (arrows indicate the small cracks in the carbon shell around NiO particles).

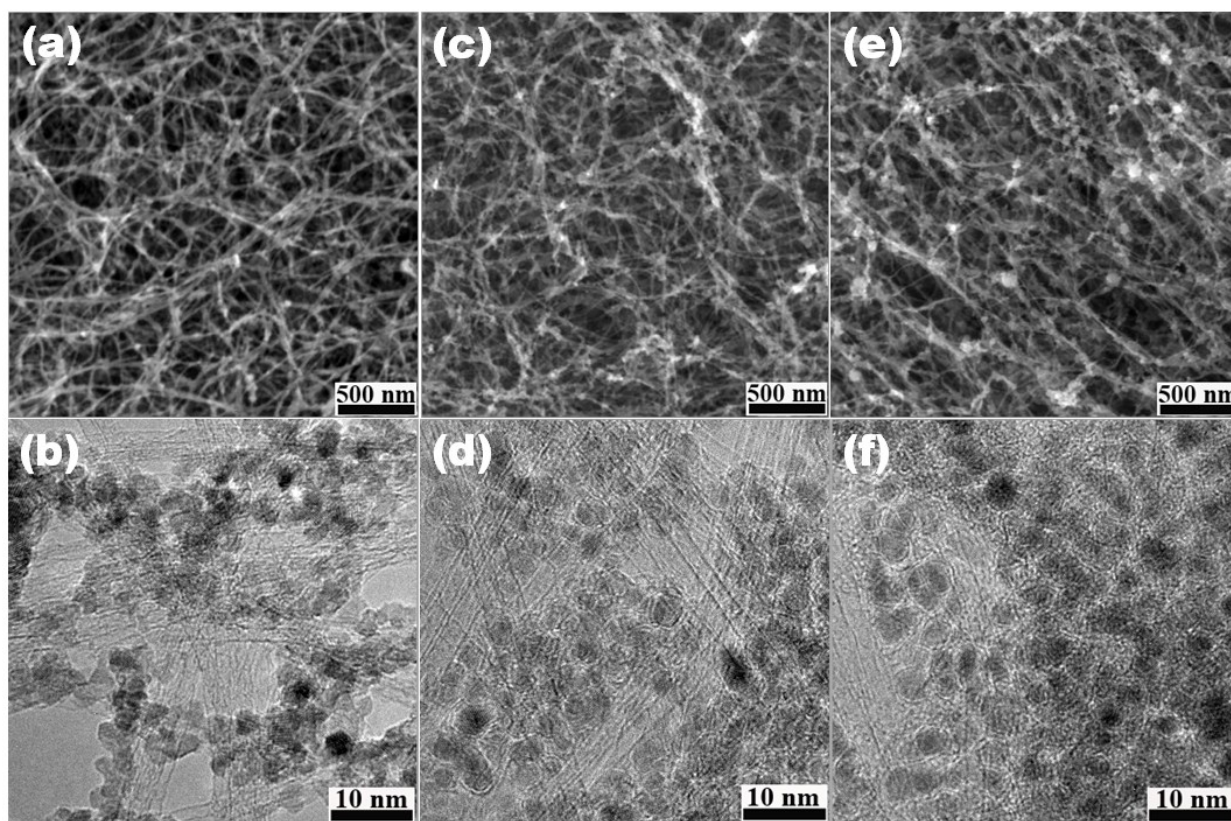

Fig. S4 (a, c, e) SEM and (b, d, f) TEM images of the (a, b) CENiO<sub>69</sub>/SWCNT, (c, d) CENiO<sub>78</sub>/SWCNT and (e, f) CENiO<sub>88</sub>/SWCNT films

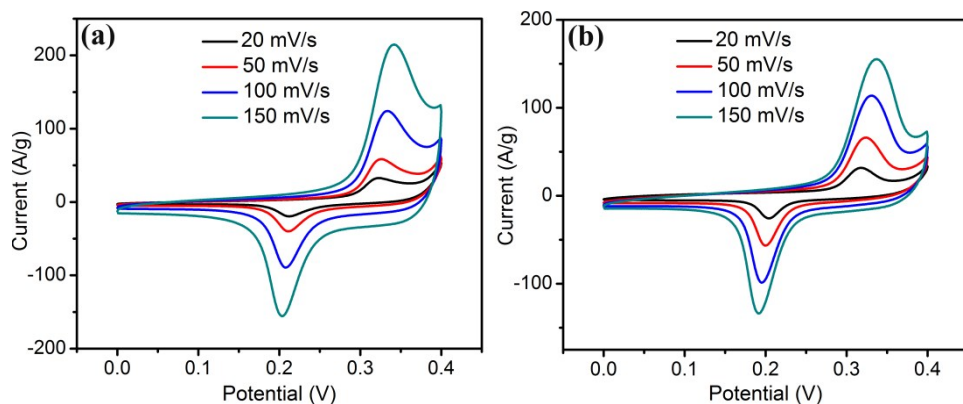

Fig. S5 CV curves of (a) CENiO<sub>69</sub>/SWCNT and (b) CENiO<sub>88</sub>/SWCNT films at different scan rates (20-150 mV s<sup>-1</sup>).

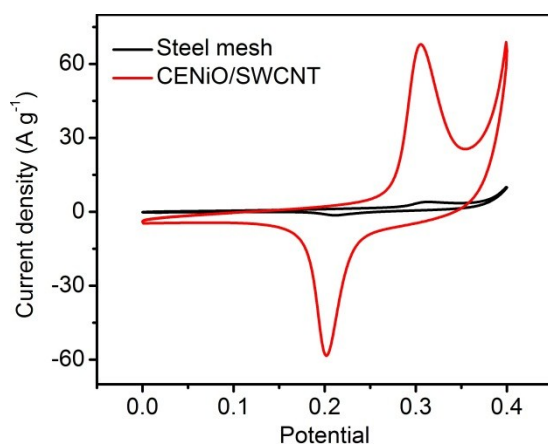

Fig. S6 CV curves of a bare steel mesh substrate and a CENiO/SWCNT film in 6 M KOH solution at 20 mV s<sup>-1</sup> after 200 cycles.

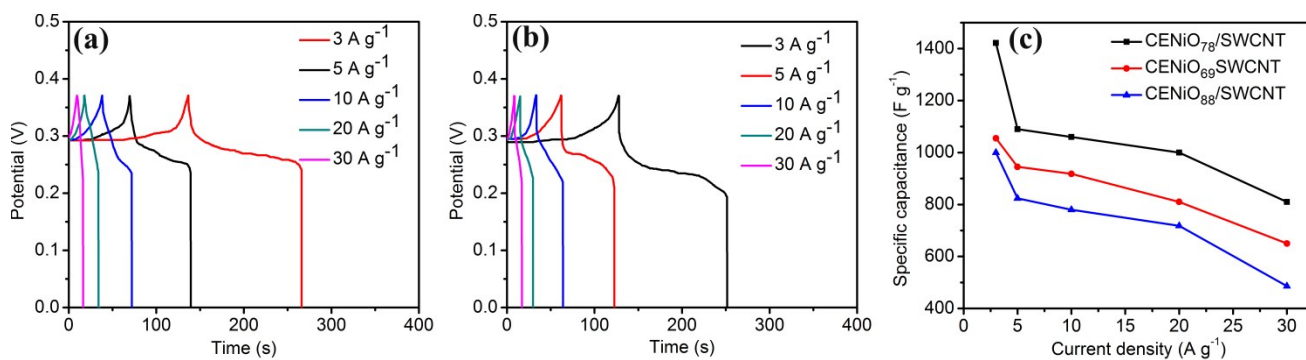

Fig. S7 (a, b) Galvanostatic charge/discharge profiles at different current densities (3-30 A g<sup>-1</sup>) of CENiO<sub>69</sub>/SWCNT and CENiO<sub>88</sub>/SWCNT films respectively. (c) Specific capacitance versus current density for CENiO<sub>69</sub>/SWCNT, CENiO<sub>78</sub>/SWCNT and CENiO<sub>88</sub>/SWCNT films.



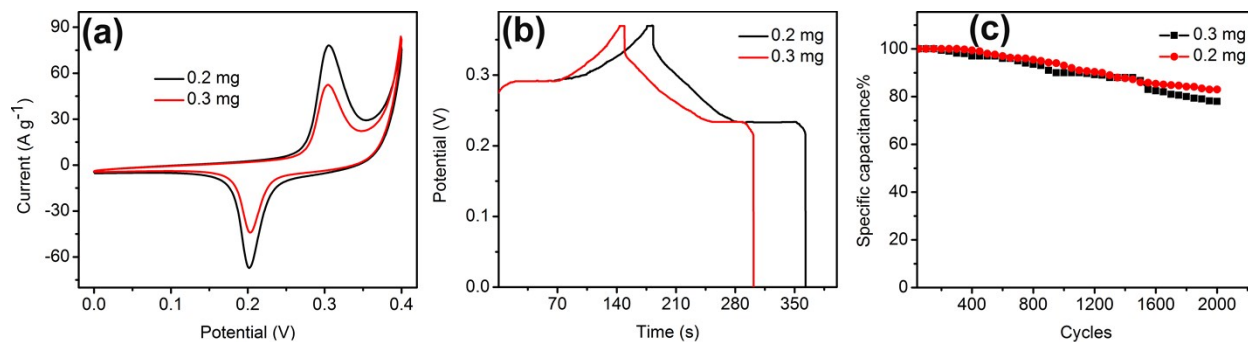

Fig. S8 (a) CV curves (b) charge-discharge profiles at a current density of 3 A g<sup>-1</sup> (c) stability test of CENiO<sub>78</sub>/SWCNT film with different mass loading.

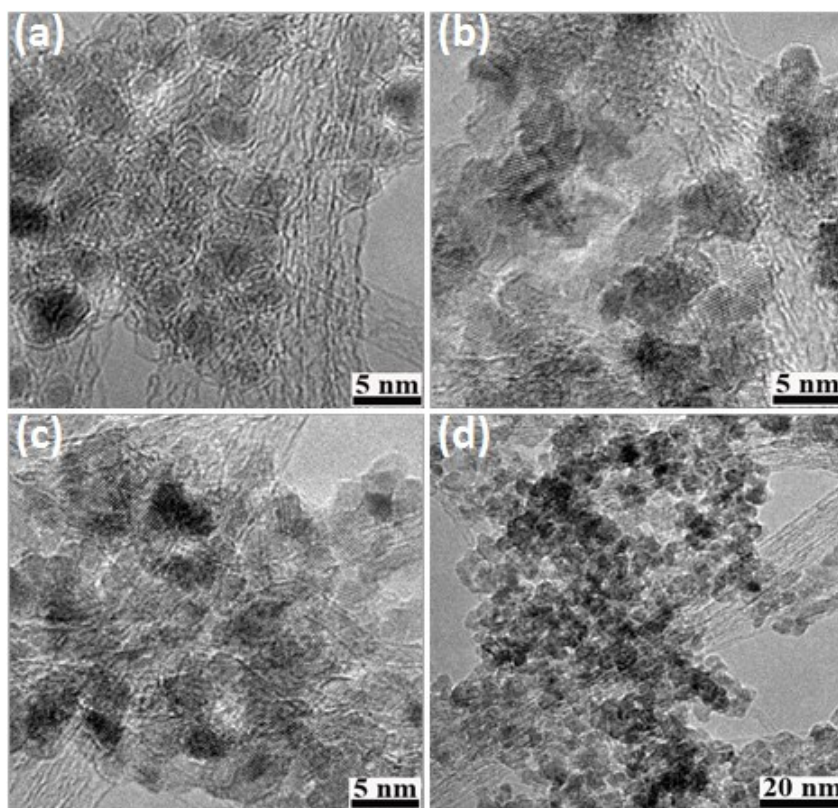

Fig. S9 TEM images of the CENiO<sub>78</sub>/SWCNT film after (a) 1000, (b) 3000 and (c, d) 5000 cycles.

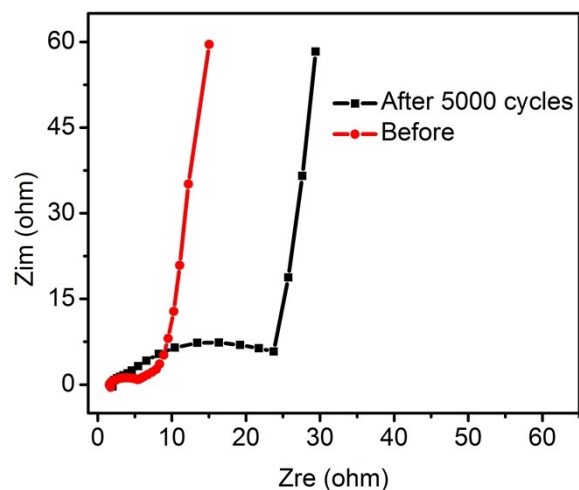

Fig. S10 EIS measurements of CENiO<sub>78</sub>/SWCNT film before and after cyclic stability test of 5000 cycles.

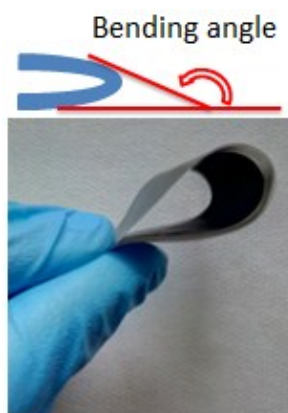

Fig. S11 Optical photograph and schematic of a CENiO<sub>78</sub>/SWCNT film for a bending test at an angle of 130°.

Table S1. Experimental parameters for the preparation of CENiO/SWCNT hybrid electrodes with different weight ratios of SWCNTs and NiO nanoparticles.

| Composite                  | Toluene (wt%) | Thiophene (wt%) | Nickelocene (wt%) | Injection rate (ml/h) |
|----------------------------|---------------|-----------------|-------------------|-----------------------|
| CENiO <sub>60</sub> /SWCNT | 96.26         | 0.62            | 3.12              | 0.70                  |
| CENiO <sub>78</sub> /SWCNT | 96.26         | 0.62            | 3.12              | 0.72                  |
| CENiO <sub>88</sub> /SWCNT | 95.99         | 0.64            | 3.35              | 0.74                  |
